# Supplementary material
Source: ML conference proceedings conference paper supplement (https://openreview.net/forum?id=MmTaM7lmvu)
Supplement: supplementary_material [file attachment]

## Sheet: Expert Evaluation Responses
Question	Question type	Question rationale	ChatNetZero	ChatClimate	GPT-4 Turbo	Gemini 1.0 Ultra	Cohere Coral
Can a company pledge net zero by 2050 and still plan to utilize fossil fuels?	Scientific	Test the ability of ChatBots/LLMs to provide scientifically accurate responses regarding the scientific basis of net zero	Yes, a company can pledge net zero by 2050 and still plan to utilize fossil fuels. However, this is not in line with IPCC and IEA net-zero emissions pathways that limit global warming to 1.5°C with no or limited overshoot. Achieving credible net zero requires the phasing down and out of fossil fuel extraction and use. Despite having net zero pledges, no major producer countries or companies have …	To pledge net zero by 2050, a company would need to significantly reduce its use of fossil fuels and transition to renewable energy sources. The transition away from fossil fuels is crucial to meeting the goals of the Paris Agreement and limiting global warming to 1.5°C or 2°C. This transition involves halting the sales of new internal combustion engine cars, decreasing the production of coal, oi…	Yes, a company can pledge to achieve net zero carbon emissions by 2050 while still planning to utilize fossil fuels, but this scenario requires careful planning, significant investment in carbon offsetting or carbon capture technologies, and a clear strategy for decreasing reliance on fossil fuels over time. Here's how it might work: 1. **Carbon Offsetting and Capture**: Companies can invest in c…	Unfortunately, there's no simple yes or no answer to this question. Here's why it's complex: What "Net Zero" Really Means True Net Zero: In principle, this means that a company removes as much greenhouse gas from the atmosphere as it emits. It's a balancing act. For fossil fuel companies, a true net zero would likely require winding down their core business over time. Loopholes: Net zero pledges …	Many companies have pledged to reach Net Zero by 2050. However, according to reports, most of these companies are not taking the necessary steps to achieve this goal. For example, the Sierra Club published a report called "The Dirty Truth" about utility companies greenwashing their image by publicly embracing net-zero pledges but continuing to burn fossil fuels. The report shows that these compan…
Can a company rely on offsets and still claim credible net zero?	Scientific	Test the ability of ChatBots/LLMs to provide scientifically accurate responses regarding the scientific basis of net zero	A company can technically claim net zero by relying on offsets, but the credibility of such claims is highly contentious and often viewed as misleading. Many companies are found to use offsetting practices, sometimes with unsuitable carbon dioxide removals, to achieve their net zero targets. However, these practices are increasingly seen as a liability and are not necessarily indicative of actual…	A company can technically rely on offsets and still claim credible net zero, but this approach is not without its challenges and criticisms. For one, the mitigation potential of net zero emission targets may require minimal reliance on offsets, focusing instead on direct emission reductions within the company's own territory (Page 54, Reference: IPCC_AR6_WGIII_Chapter13). Moreover, the quality of…	Yes, a company can rely on offsets and still claim credible net zero, but this claim's credibility depends on several factors. The concept of net zero emissions means that a company balances the amount of greenhouse gases it emits with the amount it removes or offsets, thus achieving a net effect of zero emissions. However, the credibility of such a claim hinges on how the offsets are achieved an…	Whether a company can rely solely on offsets and still credibly claim net zero is a complex and highly debated issue. Here's a breakdown of the arguments and considerations: Arguments Against Relying Solely on Offsets Not a substitute for emissions reductions: Critics argue that offsetting shouldn't be an excuse for avoiding rigorous internal emissions reductions. The focus should be on decarboni…	According to critics, corporate net-zero targets may often depend heavily on carbon offsets instead of taking rapid action to decarbonize their value chains. Carbon offset projects may often generate greenhouse gas (GHG) credits which may lead to a lack of transparency and be seen as a new form of greenwashing. Therefore, it is recommended that companies should only use offsets as a last resort t…
Does 3M or Pfizer have any conditions on the use of offsets?	Comparison	Test the ability of ChatBots to compare between actors	The provided information does not specify whether Pfizer or 3M Co have any conditions on the use of offsets in their net zero targets. Pfizer's target covers carbon dioxide and other greenhouse gases, and includes scope 1 and 2 emissions, but does not specify about scope 3 emissions. 3M Co's target covers carbon dioxide only, and does not specify if scope 1, 2, or 3 emissions are covered. Neither…	There is not enough info to answer the question. The provided information does not contain specific details about 3M or Pfizer's conditions on the use of offsets.	As of my last update in April 2023, both 3M and Pfizer have publicly discussed their climate policies and strategies for reducing greenhouse gas emissions, which include the use of carbon offsets as one part of a broader strategy to achieve their sustainability goals. However, the specifics about any conditions they place on the use of offsets can vary over time and depend on the company's evolvi…	Yes, both 3M and Pfizer likely have conditions on the use of offsets. Here's why, along with some potential conditions: What are offsets? In business, offsets are often part of large procurement contracts (especially government contracts). They are agreements where the seller commits to additional economic activity within the buyer's country to benefit that country's economy. This goes beyond sim…	I could not find specific conditions on the use of offsets for 3M. However, I did find general terms and conditions of sale for products manufactured by 3M, which states that customers must comply with federal, state, and local laws applicable to the handling, transportation, storage, use, processing, disposal, distribution, sale, and resale of 3M products. For Pfizer, the terms and conditions ap…
What are Scope 3 emissions and what categories of Scope 3 emissions should a company/subnational government include in a net-zero target?	Scientific	Test the ability of ChatBots/LLMs to provide scientifically accurate responses regarding the scientific basis of net zero	Scope 3 emissions are indirect emissions that occur in a company's value chain, including both upstream and downstream emissions. They can come from various categories such as procured products and services, investments, waste, and transport and distribution. For a company or subnational government to set a comprehensive net-zero target, it should include all Scope 3 emission categories, despite …	Scope 3 emissions, also known as 'value chain emissions', are emissions that are beyond the direct control or territorial responsibility of the entity reporting them. This could include emissions from activities such as a service or an event. These emissions are generally included in the concept of carbon neutrality, which can be applied to firms, commodities, and activities (Reference: IPCC_AR6_…	### What are Scope 3 Emissions? Scope 3 emissions, as part of the Greenhouse Gas Protocol, are defined as the indirect emissions that are not produced by the company or organization itself but are a result of its activities, from sources that it does not own or directly control. This contrasts with Scope 1 (direct emissions from owned or controlled sources) and Scope 2 (indirect emissions from th…	Here's a breakdown of Scope 3 emissions and which categories are most relevant to include in net-zero targets for companies and subnational governments: What are Scope 3 emissions? Definition: Scope 3 emissions encompass all indirect greenhouse gas (GHG) emissions occurring in a company's or government's value chain. These emissions are not produced directly by the entity itself, but are a conseq…	Scope 3 emissions, also referred to as value chain emissions, are a category of greenhouse gas (GHG) emissions originating from business operations by sources that are not directly owned or controlled by an organization. These emissions are indirect and can include instances of carbon emissions outside of a company's direct physical footprint. They are likely to be the largest share of a business…
If a city or subnational government doesn't have control of out of boundary emissions (e.g., electric utilities), how can it credibly set a net-zero target?	Scientific	Test the ability of ChatBots/LLMs to provide scientifically accurate responses regarding the scientific basis of net zero	A city or subnational government can credibly set a net-zero target even without control of out of boundary emissions by using their regulatory and procurement powers. They can incorporate new regulations that reduce emissions into their climate action plans. They should also disclose and proactively engage with higher levels of governments for the policies, regulations, and support for data and …	Cities and subnational governments can credibly set a net-zero target even if they don't have direct control over out-of-boundary emissions. They can do this by influencing emissions across supply chains that extend beyond their administrative boundaries, for example, through building codes and the choice of construction materials (Page:34, Reference:IPCC_AR6_WGIII_SPM). The effectiveness of thes…	Setting a net-zero target involves committing to reducing greenhouse gas (GHG) emissions to as close to zero as possible, with any remaining emissions offset or completely mitigated, essentially balancing emissions and absorptions. For a city or subnational government without direct control over certain emissions sources, like electric utilities located outside their administrative boundaries, ac…	Cities and subnational governments face unique challenges when setting net-zero targets due to the limitations of their influence on out-of-boundary emissions. Here's a breakdown of these challenges and how cities can still credibly address them: Challenges Scope 3 Emissions: A significant portion of a city's emissions often falls under Scope 3, which includes indirect emissions from activities o…	Even though cities have a crucial role in meeting climate goals, the challenge with emissions is that they can be generated within and outside of a city's boundaries. This means that a city's government doesn't always have control over the emissions, as they might not be produced within their jurisdiction. In this case, it can be difficult to set a net-zero target, especially if the city doesn't …
What is an example of a company (or country) that has produced a 'good plan' to achieve their target?	Evaluative	Test the ability of ChatBots/LLMs to make evaluative (even normative) judgments based on best practice principles and science	An example of a company that has produced a 'good plan' to achieve their target is Swedish Match AB, Wolters Kluwer, or Mowi ASA. These companies have a science-based target as their end target by 2050, serving as role models for other companies around the world. Their plans are scrutinized to ensure they are setting the right examples. Another promising example is Holcim, H&M Group, Maersk, Stel…	There are several examples of countries and regions that have produced effective plans to achieve their climate targets. For instance, California and Germany have linked their economies to a sustainable future through energy-wide efforts of structural change (Page:54, Reference:IPCC_AR6_WGIII_Chapter13). Another example is Manizales, Colombia, which has included climate adaptation into long-estab…	An example of a company that has formulated and executed a good plan towards their target is Tesla, Inc., especially in their mission to accelerate the world's transition to sustainable energy. Tesla's approach spans several fronts, including electric vehicles (EVs), energy storage, and solar technology. **Strategic Focus Areas for Tesla:** 1. **Electric Vehicles (EVs):** Tesla started by produci…	Here's an example of a company that has produced a good plan to achieve its targets, along with some reasons why: Company: Patagonia Target: Become carbon neutral across its full operations, including its extensive supply chain, by 2025. Why this is a 'good plan': Ambitious but Realistic: The target is highly challenging yet achievable. It forces innovation and rethinking of processes but doesn't…	I found multiple examples of companies that have implemented plans which have led to their success. Here are a few: McDonald's is a successful global brand which has a consistent marketing strategy with region-specific adaptations. For example, McDonald's offers the McArabia flatbread sandwich in its Middle Eastern restaurants, and macaroons on its French menu. This strategy allows them to captur…
What constitutes a credible net-zero target?	Evaluative	Test the ability of ChatBots/LLMs to make evaluative (even normative) judgments based on best practice principles and science	A credible net-zero target is characterized by a comprehensive plan that ensures timely implementation of deep decarbonisation. It should include credible and ambitious interim targets, which are crucial for robust net zero delivery and limiting cumulative emissions. These interim targets also provide confidence that an entity is on a path towards net zero emissions. The targets should be adequat…	A credible net-zero target is constituted by several factors. Firstly, it implies economy-wide systemic change (Page: 53, Reference: IPCC_AR6_WGIII_Chapter13). The adoption and implementation of such targets depend on equity and capacity considerations, and the formulation of net zero pathways by countries will benefit from clarity on scope, plans-of-action, and fairness (Page: 26, Reference: IPC…	A credible net-zero target is a commitment made by a country, corporation, or another entity to reduce its net greenhouse gas (GHG) emissions to zero by a specific future date. For a net-zero target to be considered credible, it must be comprehensive, ambitious, transparent, and scientifically aligned with global efforts to mitigate climate change, particularly the goals of the Paris Agreement, w…	Here's a breakdown of what makes a net-zero target credible, along with the key elements you should look for: What is Net-Zero? Definition: Net-zero emissions means achieving a balance between the greenhouse gases (GHGs) released into the atmosphere and those removed. This requires drastic reductions in emissions along with strategies to remove any unavoidable emissions already in the atmosphere.…	With the urgency to combat climate change, net-zero targets have become a critical tool for businesses to implement ambitious carbon reduction goals. These targets are credible if they follow best practices, which include: Being science-based, transparent, and measurable. Encompassing Scope 3 emissions, near-term and long-term strategies. Having reliable data on a company's greenhouse gas emissio…
What are examples of greenwashing in corporate net-zero targets?	Evaluative	Test the ability of ChatBots/LLMs to make evaluative (even normative) judgments based on best practice principles and science	Greenwashing in corporate net-zero targets can be seen in several ways. Some companies only declare vague intentions to set net-zero targets, without embedding them in corporate strategy documents or annual reports. Others give the impression of aiming for deep emission reductions without committing to them, such as Amazon, Nestlé, and Inditex. Some companies, like Carrefour, Samsung, and Walmart…	Greenwashing in corporate net-zero targets can take several forms. One example is when companies announce projected sustainability or net-zero targets and claim the associated positive reputational impact, but they do not have a clear action plan in place to achieve these targets. This can be due to the lack of mandatory reporting frameworks, which results in an over-reliance on self-reported car…	Greenwashing, where companies misleadingly boast about their environmental efforts to appear more sustainable than they actually are, is prevalent in the corporate world, especially regarding net-zero targets. These targets often sound ambitious but can lack substance, transparency, or feasibility. Some common examples of greenwashing tactics in corporate net-zero strategies include: 1. **Vague T…	Here's a breakdown of how companies can engage in greenwashing their net-zero targets, along with some examples: Types of Greenwashing Vague or Misleading Claims: Companies exaggerating their environmental efforts with terms like "eco-friendly", "sustainable", or "net-zero" without specific, measurable actions to back them up. Example: An oil company promotes its small-scale investment in renewab…	Experts consider net-zero targets to be greenwashing when companies don't take robust measures to implement the targets. For instance: Walmart has an official strategy to reach zero emissions by 2040, but according to critics, their plan excludes Scope 3 emissions, which make up 95% of the company's emissions. Oil and gas companies that plan to pay for offsets instead of dealing with emissions ca…
What does it mean for a company's net-zero target to be 1.5C aligned?	Evaluative	Test the ability of ChatBots/LLMs to make evaluative (even normative) judgments based on best practice principles and science	A company's net-zero target being 1.5°C aligned means that the company's emission reduction commitments and transition plans are in line with the global efforts required to limit global warming to 1.5°C. This includes setting absolute emission reduction targets informed by sector-specific modelled emission pathways, restricting the use of carbon dioxide removal offsets, and aligning lobbying and …	For a company's net-zero target to be 1.5°C aligned, it means that the company must aim to achieve net-zero CO2 emissions by around 2050 to limit global warming to 1.5°C, as per the median value suggested in the SR1.5 report (Page:40, Reference:IPCC_AR6_WGIII_TechnicalSummary). This involves a rapid transition to renewable energy sources and a timely phasing out of fossil fuels, especially coal (…	A company's net-zero target being 1.5°C aligned means that its goal and actions to achieve net-zero greenhouse gas (GHG) emissions are designed to be consistent with limiting global warming to 1.5 degrees Celsius above pre-industrial levels. This alignment is in accordance with the most ambitious aim of the Paris Agreement, a global pact adopted in 2015 by 196 Parties to mitigate climate change. …	Here's what it means for a company's net-zero target to be 1.5C aligned: The 1.5C Goal: The Paris Agreement aims to limit global warming to well below 2°C, ideally to 1.5°C, compared to pre-industrial levels. A 1.5C aligned net-zero target reflects the most ambitious goal of the Paris Agreement. Net-Zero Emissions: Net-zero means the company drastically reduces its greenhouse gas emissions and co…	Science-Based Targets and the Net-Zero Standard report provides an outline for businesses to achieve a 1.5°C future. The Business Ambition for 1.5°C campaign was an urgent call to action from a global coalition of UN agencies, business, and industry leaders, in partnership with the Race to Zero. Companies can join the Race to Zero by committing to net-zero with an official validation process. The…
Is Apple's net zero target credible?	Evaluative	Test the ability of ChatBots/LLMs to make evaluative (even normative) judgments based on best practice principles and science	Apple's net zero target appears to be credible. The company has committed to achieving carbon neutrality for its entire carbon footprint by 2030, covering scope 1, 2, and 3 emissions. This is equivalent to a 62% reduction in emissions relative to 2019. Apple has already achieved carbon neutrality for its corporate operations since April 2020. The company allows for offsets from nature-based solut…	There is not enough info to answer the question. The provided information does not contain specific details about Apple's net zero target, its scope, plans-of-action, or milestones against which to track progress. Therefore, it's not possible to assess the credibility of Apple's net zero target based on the given information.	As of my last update in April 2023, Apple has made a commitment to become carbon neutral across its entire business, manufacturing supply chain, and product life cycle by 2030. This means that every Apple device sold would, from production through to disposal, have a net-zero climate impact. Apple's net-zero target is considered ambitious, and the company has outlined specific plans for achieving…	Apple's net zero target has been met with mixed reactions, with some praising their efforts and others expressing skepticism. Here's a breakdown of why their plan has both strengths and areas for further scrutiny: Reasons Apple's target could be considered credible: Ambitious Timeline: Apple's 2030 target is significantly more aggressive than many other corporations, and even outpaces IPCC (Inter…	Apple's net zero target is credible because the company has unveiled a linchpin of new sustainability measures and investments to address emissions across its global business, supply chain, and products by 2030. Apple has previously stated that its suppliers account for around 70% of its total carbon footprint, so the company has required its suppliers to share their carbon data so it can provide…
What does it mean for an entity to contribute a 'fair-share' of emissions reductions?	Scientific	Test the ability of ChatBots/LLMs to provide scientifically accurate responses regarding the scientific basis of net zero	A 'fair-share' of emissions reductions for an entity implies a commitment to a specific plan for achieving net zero targets, including interim targets and annual reporting. It involves clarity on which greenhouse gases and sources are covered. Entities may contribute through climate contributions, supporting climate change mitigation beyond their value chain without claiming neutralisation, or by…	Contributing a 'fair share' of emissions reductions refers to the concept of equity in climate action, where each entity (such as a country) contributes to global emissions reductions in a manner that is considered fair and equitable. This concept is complex and challenging to determine due to the voluntary nature of climate contributions and the self-differentiation in contributions by different…	The concept of an entity contributing its "fair share" of emissions reductions is rooted in the broader context of addressing climate change and global warming. It implies that every entity, whether it's a country, corporation, municipality, or individual, has a responsibility to reduce greenhouse gas emissions in proportion to its capabilities, historical emissions, and economic capacity. The pr…	Here's a clear explanation of what it means for an entity to contribute a "fair share" of emissions reductions, including the key principles involved: What is a "Fair Share" of Emissions Reductions? The concept of a "fair share" in emissions reduction means that each entity (country, company, or even individual) has an equitable responsibility to reduce their greenhouse gas emissions to help limi…	National 'fair shares' in reducing greenhouse gas emissions are emissions reduction targets. These are often interpreted based on international environmental law principles to assess indicators of fair share emissions reductions and narrow the range of what is considered a fair share for individual countries. There is, however, no agreed-upon definition of what constitutes a fair share. Fair shar…
Is Wal-Mart greenwashing its climate commitments?	Evaluative	Test the ability of ChatBots/LLMs to make evaluative (even normative) judgments based on best practice principles and science	Based on the information provided, it does not appear that Walmart is greenwashing its climate commitments. The company has set clear targets to achieve zero emissions across global operations by 2040 and reduce absolute scopes 1 and 2 GHG emissions 35% by 2025 and 65% by 2030 from a 2015 base year. Walmart also plans to reduce CO2e emissions from upstream and downstream scope 3 sources by one bi…	There is not enough info to answer the question. The provided information does not specifically address Wal-Mart's climate commitments or any potential greenwashing.	As of my last update in April 2023, accusations of greenwashing, where a company gives a misleading impression or provides false information about how environmentally friendly its policies, practices, or products are, have been levied against many corporations, including some retail giants like Wal-Mart (also known as Walmart, Inc.). Walmart has made numerous commitments toward sustainability and…	Whether Walmart is living up to its climate commitments is a complex issue. Here's a breakdown of the two sides: Accusations of greenwashing: Rising emissions: Critics point to a rise in Walmart's overall emissions despite their sustainability efforts. This could be due to factors like supply chain growth outweighing efficiency gains [3]. Focus on in-store operations: Some argue Walmart downplays…	Walmart's sustainability strategy, Project Gigaton, launched in 2017, has been recognized as an unprecedented, ambitious attempt to reduce emissions. Walmart's efforts to become more sustainable include the following: Seeking to avoid one gigaton of emissions by 2030. Aiming to be a zero-emissions company by 2040 without relying on carbon offsets. Aspiring to be a 100% renewably-powered, zero-was…

## Sheet: Factual Evaluation Responses
Question	Question ID	ChatNetZero	ChatClimate	GPT-4 Turbo	Gemini 1.0 Ultra	Cohere Coral
How does Walmart’s climate goals compare with Amazon’s and other large retail stores?	Q1	Both Walmart and Amazon have set a goal to achieve zero emissions across global operations by 2040 (a) (b). Net Zero Tracker Walmart has a detailed plan that includes measures for all emission scopes and annual reporting (1). Net Zero Tracker It also commits to reduce absolute scopes 1 and 2 GHG emissions 35% by 2025 (c) and 65% by 2030 (d), and to reduce CO2e emissions from scope 3 sources by on…	There is not enough info to answer the question (i). The provided references do not contain specific information comparing the climate goals of Walmart, Amazon, or other large retail stores (ii).	As of 2023, Walmart, Amazon, and other large retail stores have been increasingly vocal and active in their commitments to sustainability and addressing climate change (1). Both Walmart and Amazon, two of the largest retailers globally, have laid out ambitious climate goals (2). Their efforts illustrate a growing trend in the retail sector towards reducing carbon footprints, enhancing sustainabil…	Here's a breakdown of how Walmart's climate goals stack up against Amazon and other large retailers (i): Walmart Scope 1 & 2 Emissions: Aims for zero emissions across its own operations by 2040, without the use of carbon offsets. (a) Scope 3 Emissions: Targets a 1 billion metric ton reduction in its supply chain emissions by 2030 ("Project Gigaton"). (b) Renewable Energy: Has committed to sourcin…	Walmart has laid out plans to achieve zero emissions by 2040 (a). The company has also launched Project Gigaton, aimed at reducing emissions by one gigaton from its value chain by collaborating with vendors and suppliers (b). The company has also committed to getting 100% of its energy from renewable sources by 2035 (c). Some critics argue that Walmart's climate goals do not include the company's…
How many nations in the world have a net zero target enshrined in law?	Q2	As of June 2022, 16 nations in the world have a net zero target enshrined in law (a). Net Zero Stocktake 2022 This is an increase from seven nations in December 2020 (b). Net Zero Stocktake 2022 These countries with net zero targets in law account for about 75% of total greenhouse gas emissions covered by national net zero targets, or two-thirds of global total greenhouse gas emissions (c). Net Z…	As of 1 October 2021, the ECIU Net Zero Tracker states that Germany, Sweden, the European Union, Japan, United Kingdom, France, Canada, South Korea, Spain, Denmark, New Zealand, Hungary and Luxembourg have net zero targets set in law (IPCC_AR6_WGIII_Chapter13, Page:53) (a).	As of my last update in April 2023, there are 11 countries that have legally enshrined their net zero targets (a). These targets represent national commitments to reduce greenhouse gas emissions to net zero by a specified year, generally by the mid-21st century (1). Net zero means that any emissions are balanced by absorbing an equivalent amount from the atmosphere, aiming to significantly mitiga…	It's difficult to provide a precise, up-to-the-minute number of nations with net-zero targets enshrined in law for a few reasons (i): Dynamic Landscape: The number of countries adopting net-zero targets into law is constantly changing (ii). New legislation can be passed, and existing targets can be strengthened (iii). Clarity in Definitions: There's some ambiguity about what counts as "enshrined …	According to an April 2022 report by the Energy and Climate Intelligence Unit, there are 42 countries that have a net zero target enshrined in law (a). The report also states that 16 of these countries are on track to achieving their net zero goals (b). The majority of these countries are in Europe, with the UK, France, and Germany being some of the leading countries with net zero targets (c). Th…
How many companies rule out the use of offsets / credits for their net zero targets?	Q3	The text does not provide a specific number of companies that rule out the use of offsets or credits for their net zero targets (i). Net Zero Stocktake 2022 However, it is mentioned that less than 2% of companies explicitly rule out their use. (a) Corporate Climate Responsibility Monitor 2023 The majority of companies, nearly 60%, have not specified their stance on the use of offsetting. (b) Corp…	The provided information does not specify the exact number of companies that rule out the use of offsets or credits for their net zero targets (i). It is mentioned that many companies and institutions have announced net zero emissions targets in recent years, and some areas within these targets might need to be changed, including minimal reliance on offsets (Reference: IPCC_AR6_WGIII_Chapter13, P…	As of my last update in April 2023, specific and exact numbers of companies ruling out the use of offsets or credits for their net zero targets are not readily available, primarily because company policies on climate commitments, including the use of carbon offsets or credits, are varied and constantly evolving (i). Business attitudes towards carbon offsets are mixed (1). Some companies embrace o…	It's difficult to provide an exact number of companies that completely rule out carbon offsets for several reasons (i): Evolving landscape: The standards and frameworks for net-zero targets are constantly being updated. Some companies may change their policies over time in response to new guidance. (1) Inconsistent Definitions: There's often a lack of a unified understanding of what "ruling out" …	I could not find the exact number of companies that rule out the use of offsets/credits for their net zero targets (i). However, here is some information I found on the topic (ii). Some companies have indicated that they do not intend to use offsets/credits to reach their net zero targets, for instance, BP stated that it intends to reach its 2030 emissions target without offsets, but they “may he…
Does 3M or Pfizer have any conditions on the use of offsets?	Q4	The provided information does not specify whether Pfizer or 3M Co have any conditions on the use of offsets in their net zero targets (i). Net Zero Tracker Pfizer's target covers carbon dioxide and other greenhouse gases, and includes scope 1 and 2 emissions, but does not specify about scope 3 emissions (a). Net Zero Tracker 3M Co's target covers carbon dioxide only, and does not specify if scope…	There is not enough info to answer the question (i). The provided information does not contain specific details about 3M or Pfizer's conditions on the use of offsets (ii).	As of my last update in April 2023, both 3M and Pfizer have publicly discussed their climate policies and strategies for reducing greenhouse gas emissions, which include the use of carbon offsets as one part of a broader strategy to achieve their sustainability goals (1). However, the specifics about any conditions they place on the use of offsets can vary over time and depend on the company's ev…	There is not enough info to answer the question (i). The provided information does not contain specific details about 3M or Pfizer's conditions on the use of offsets (ii).	I could not find specific conditions on the use of offsets for 3M (i). However, I did find general terms and conditions of sale for products manufactured by 3M, which states that customers must comply with federal, state, and local laws applicable to the handling, transportation, storage, use, processing, disposal, distribution, sale, and resale of 3M products (1). For Pfizer, the terms and condi…
How do the United States, China, Wal-Mart, Apple and California compare in terms of their decarbonization efforts?	Q5	The United States has various companies with different decarbonization targets, including climate neutrality, climate positivity, carbon negativity, and science-based targets. (1) Net Zero Tracker China aims to peak carbon emissions before 2030 (a) and achieve carbon neutrality by 2060, with plans detailing decarbonization measures for all sectors. (b) Net Zero Tracker Walmart aims for net zero e…	The provided information does not give specific details on the decarbonization efforts of the United States, China, Wal-Mart, Apple, and California (i). However, it does provide some general insights (ii). For instance, the United States has seen a decrease in power sector CO2 emissions from 1990-2015 (a) (Page:72, Reference:IPCC_AR6_WGIII_Chapter02). China's cities have shown varying degrees of …	As of my last update in April 2023, comparing the decarbonization efforts of different entities like countries, a state, and companies involves looking at multiple dimensions, such as energy policies, investment in renewable resources, carbon neutrality commitments, and the reduction of overall carbon footprint (1). Here's a brief overview of the decarbonization efforts of the United States, Chin…	Here's a breakdown of decarbonization efforts by the United States, China, Wal-Mart, Apple, and California (i): United States Federal Level: The Biden administration has set ambitious goals to achieve a carbon pollution-free power sector by 2035 (aa) and net-zero greenhouse gas emissions by 2050 (ab). The Inflation Reduction Act provides significant funding for clean energy initiatives. Challenge…	Comparing the decarbonization efforts of the United States, China, Wal-Mart, Apple, and California is an interesting approach to understanding the progress made by these entities (1). Here's a comparison of their initiatives (i): The United States: The United States is working towards achieving net-zero greenhouse gas emissions by 2050 as per recent legislation (a). The country's energy transitio…
How does Foxconn’s climate goals compare with Fast Retailing’s? Limit response to 100 words and use your most recent information, including databases and searching online.	Q6	The comparison of Foxconn's climate goals with Fast Retailing's cannot be made as the provided information only includes details about Fast Retailing's targets (i). Net Zero Tracker Fast Retailing has committed to a variety of interim targets, including a 90% reduction in scope 1 and 2 emissions by 2030 (a), and aims for net zero emissions by 2050 (b). Net Zero Tracker They have also signed the f…	I'm sorry, but the provided information does not contain specific details about the climate goals of Foxconn or Fast Retailing (i). Therefore, I cannot provide a comparison between the two. For the most accurate and up-to-date information, I recommend checking the companies' official websites or their latest sustainability reports (ii). (In-house knowledge)	As of my last update, Foxconn (also known as Hon Hai Precision Industry Co., Ltd.) aims for 20% renewable energy use by 2025 (a) and strives to reach net-zero carbon emissions by 2050 (b). In comparison, Fast Retailing, the parent company of UNIQLO (c), set a target to reduce greenhouse gas emissions from its own operations by 2030 in line with the Paris Agreement (d). Both companies have committ…	Finding specific climate goals for Foxconn (manufacturer) is challenging (i). They seem more focused on reducing waste and energy use in production (1). Fast Retailing (owner of Uniqlo) has set ambitious goals for renewable energy use, emissions reduction, and sustainable materials (2). While Foxconn may be making strides internally, Fast Retailing appears to be taking a more public stance on com…	Foxconn has committed to achieving net-zero emissions by 2050 (a), with interim targets of a 63% reduction by 2035 (b), 42% by 2030 (c), and 21% by 2025 (d). The company also aims to use at least 50% green power by 2030 (e) and has committed to complying with local carbon emission policies (f). Fast Retailing has committed to reducing absolute GHG emissions from its own operations by 90% by fisca…
How does VakifBank and Saudi Aramco compare in terms of their climate policy’s end target status? Limit response to 100 words and use your most recent information, including databases and searching online.	Q7	VakifBank and Saudi Aramco both aim to reduce their greenhouse gas emissions, but their targets and approaches differ (1). Net Zero Tracker VakifBank sets annual targets, achieving a 4% reduction relative to 2019 emissions (a) and claiming to be carbon negative in 2020 by offsetting more emissions than it produced (b). Net Zero Tracker It covers scope 1, 2, and 3 emissions but does not cover hist…	There is not enough info to answer the question (i). The provided references do not contain specific information about the climate policy's end target status of VakifBank and Saudi Aramco (ii).	As of my last update, VakifBank and Saudi Aramco have distinct approaches and statuses in their climate policy targets (1): 1. **VakifBank** has not clearly defined or publicized comprehensive climate policy targets (2). Their sustainability efforts primarily focus on promoting green banking principles and enhancing energy efficiency within their operations (3). 2. **Saudi Aramco** has articulate…	I can't access and process information from the real world through Google Search yet, but I can help you find some sources to compare the climate policies of VakifBank and Saudi Aramco (i). You can search [Saudi Aramco climate change policy ON aramco.com] and [VakifBank climate change policy ON VakıfBank vakifbank.com.tr] to see their end targets (ii).	In 2022, Oil Change International revealed that climate change would strongly affect the valuation of Saudi Aramco, the world's largest oil company (a). The company's value could be reduced to as little as $700 billion if efforts to cut emissions reduce oil demand (1). On the other hand, the EIB provided EUR 75 million to VakifBank for climate action in Turkey (b). The project contributes to EU r…
How does Reliance Industries and Emaar Properties compare in terms of their climate interim targets? Limit response to 100 words and use your most recent information, including databases and searching online.	Q8	Reliance Industries and Emaar Properties both lack interim targets for their climate goals (a). Net Zero Tracker Reliance Industries aims to be net zero by 2035, covering only carbon dioxide and scope 1 and 2 emissions (b). Net Zero Tracker It does not specify if scope 3 emissions are covered (c) and does not cover historical emissions (d). Net Zero Tracker Emaar Properties had a 7% emission redu…	There is not enough info to answer the question (i). The provided references do not contain specific information about the climate interim targets of Reliance Industries and Emaar Properties (ii). For the most accurate and recent information, it would be best to directly refer to the companies' official reports or statements regarding their climate targets (iii).	As of my last update, Reliance Industries and Emaar Properties have distinct approaches to climate interim targets (1). Reliance Industries, an Indian conglomerate, has set a target to become net carbon zero by 2035 (a). This includes initiatives in renewable energy, particularly in solar, battery storage, and hydrogen (b). Emaar Properties, a UAE-based real estate developer, focuses more broadly…	I cannot access and process information from databases in real-time, but I can provide some general information based on publicly available sources (i). Finding a direct comparison of Reliance Industries' and Emaar Properties' climate interim targets is difficult (ii). However, both companies have made public commitments to sustainability (1). Reliance Industries aims to achieve net-zero carbon e…	Emaar Properties has multiple initiatives in place to reduce emissions, waste, and water consumption (1). However, I was unable to find any specific interim targets (i). Reliance Industries has set a target of net carbon zero by 2035 (a), with a 100% emission reduction target for its scope 1 and 2 emissions (b). The company also plans to increase its renewable energy capacity to 100 gigawatts by …

## Sheet: Factual Evalution Results
Step 1
Question ID	ChatNetZero	ChatClimate	GPT-4 Turbo	Gemini 1.0 Ultra	Cohere Coral
Q1	1	0	1	1	1
Q2	1	1	0	1	0
Q3	1	0	0	0	0
Q4	0	0	0	0	0
Q5	1	1	1	1	1
Q6	0	0	0	0	1
Q7	1	0	1	0	0
Q8	1	0	0	0	0
Mean	0.75	0.25	0.375	0.375	0.375
SD	0.46	0.46	0.52	0.52	0.52
Step 2
Question ID	ChatNetZero	ChatClimate	GPT-4 Turbo	Gemini 1.0 Ultra	Cohere Coral
Q1	0.75	0	0.93	0.5	0.62
Q2	1	1	0.67	1	0.33
Q3	0.67	0	0	0	1
Q4	0.75	0	0.33	0	0
Q5	1	1	1	1	0.84
Q6	0.75	0	0.5	0	0.78
Q7	0.83	0	0.67	0	1
Q8	0.56	0	0.25	0.33	0.67
Summary	0.79	0.25	0.54	0.35	0.65
SD	0.15	0.46	0.34	0.44	0.34
Combined
Factual Score	0.77	0.25	0.4575	0.3625	0.5125
